# Supplementary material for: Kinetic characteristics of enhanced photochromism in tungsten oxide nanocolloid adsorbed on cellulose substrates, studied by total internal reflection Raman spectroscopy
Source: Royal Society of Chemistry journal article supplement (doi:10.1039/c2ra00217e), 2012-01-01
Supplement: c2ra00217e.pdf [file c2ra00217e.pdf]

**Electronic Supplementary Information for:**

**Title: Kinetic Characteristics of Enhanced Photochromism in Tungsten Oxide Nanocolloid Adsorbed on Cellulose Substrates, Studied by Total Internal Reflection Raman Spectroscopy.**

Authors: Kenta ADACHI <sup>1\*</sup>, Tomohiro MITA <sup>1</sup>, Shohei TANAKA <sup>1</sup>, Kensuke HONDA <sup>1</sup>,  
Suzuko YAMAZAKI <sup>1</sup>, Masaharu NAKAYAMA <sup>2</sup>, Takeyoshi GOTO <sup>3†</sup>, Hitoshi WATARAI <sup>3</sup>.

- (1) Department of Environmental Science & Engineering, Graduate School of Science & Engineering, Yamaguchi University, Yamaguchi, 753-8512, Japan.
  - (2) Department of Material Chemistry, Graduate School of Science & Engineering, Yamaguchi University, Ube, Yamaguchi, 755-8611, Japan.
  - (3) Department of Chemistry, Graduate School of Science, Osaka University, Toyonaka, Osaka, 560-0043, Japan.
- † Present address : Nondestructive Evaluation Laboratory, Analytical Science Division, National Food Research Institute (NFRI), Tsukuba, Ibaraki, 305-8642, Japan.

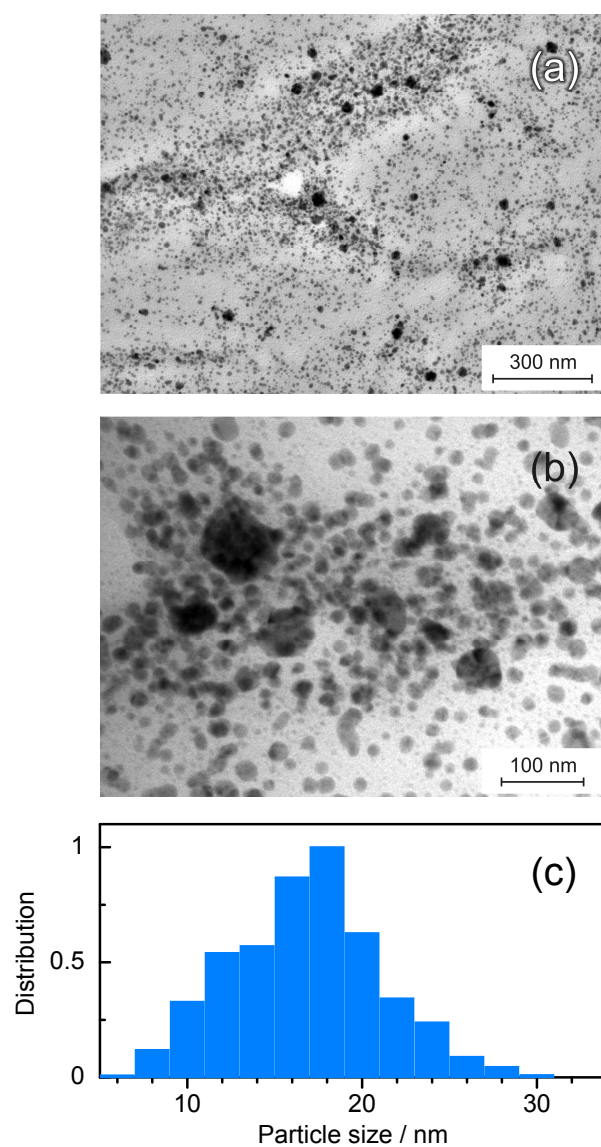

**Figure S1** TEM image of the as-prepared  $\text{WO}_3$  colloid. (a) low magnification ( $\times 100,000$ ), (b) high magnification ( $\times 500,000$ ). (c) corresponding  $\text{WO}_3$  colloid particle size distribution histogram.

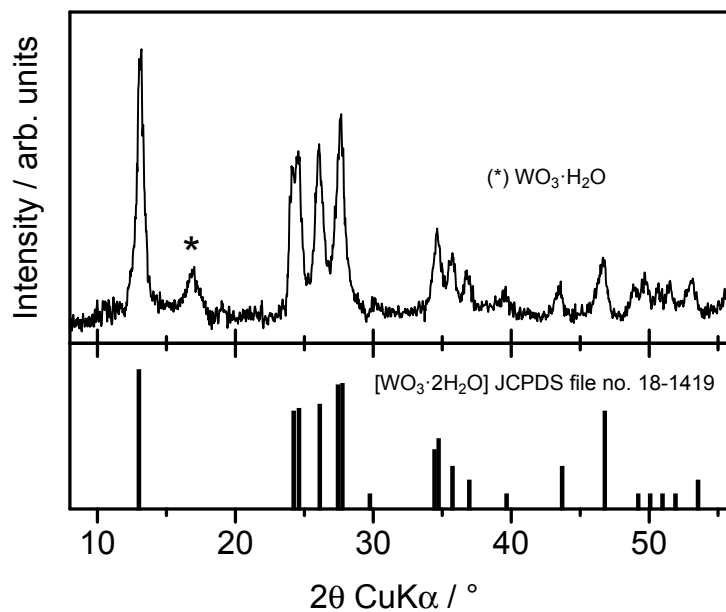

**Figure S2** Powder XRD pattern of dried WO<sub>3</sub> colloids prepared in this study (which can be indexed to WO<sub>3</sub>·2H<sub>2</sub>O, JCPDS No. 18-1419, and the peak marked with (\*) belongs to the 020 reflection of WO<sub>3</sub>·H<sub>2</sub>O, JCPDS No. 18-1418).

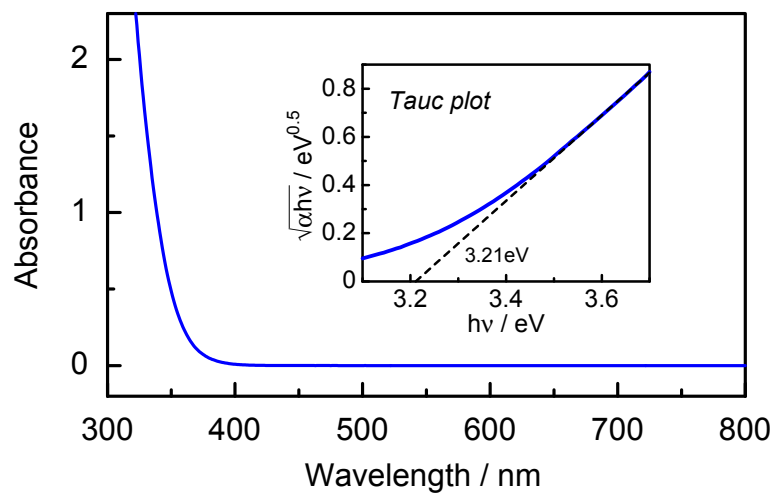

**Figure S3** UV-Vis absorption spectrum of as-prepared WO<sub>3</sub> colloid solution. The inset shows the corresponding Tauc plot around the absorption edge for estimating the optical band gap energy.

**Table S1** Assignments for vibrational Raman bands for CE and TACE. [Ref. S1]

| Raman shift / $\text{cm}^{-1}$ |      | Assignment                                                               |
|--------------------------------|------|--------------------------------------------------------------------------|
| CE                             | TACE |                                                                          |
| 1150                           | 1158 | $\nu(\text{C-C})$ ring breathing, asymmetric stretching                  |
| 1122                           | 1125 | $\nu(\text{C-O-C})$ glycosidic link, symmetric; $\nu(\text{C-O-C})$ ring |
| 1095                           | 1085 | $\nu(\text{C-O-C})$ glycosidic link, asymmetric stretching               |
|                                | 911  | $\nu(\text{C-(C=O)})$ symmetric stretching (evidence of acetate)         |
| 901                            |      | $\nu(\text{C-O-C})$ in-plane, symmetric                                  |
|                                | 841  | $\nu(\text{C-CH}_3)$ stretching (evidence of acetate)                    |
|                                | 659  | $\delta(\text{O-C=O})$ in-plane deformation (evidence of acetate)        |
| 519                            | 515  | $\delta(\text{C-O-C})$ glycosidic link                                   |
| 459                            |      | $\delta(\text{C-C-O})$ ring deformation                                  |
| 435                            | 431  | $\delta(\text{C-C-O})$ ring deformation                                  |
| 381                            | 383  | $\delta(\text{C-C-C})$ ring deformation                                  |

### Reference

- [S1] Socrates, G. *Infrared and Raman Characteristic Group Frequencies: Tables and Charts* (3rd Edition), John Wiley & Sons, New York, USA. (2001).
